# Supplementary material for: Novel solvent properties of choline chloride/urea mixturesElectronic supplementary information (ESI) available: spectroscopic data. See http://www.rsc.org/suppdata/cc/b2/b210714g/
Source: Royal Society of Chemistry journal article supplement (doi:10.1039/b210714g), 2002-11-26
Supplement: b210714g.doc [file b210714g.doc]

Electronic Supplementary Information


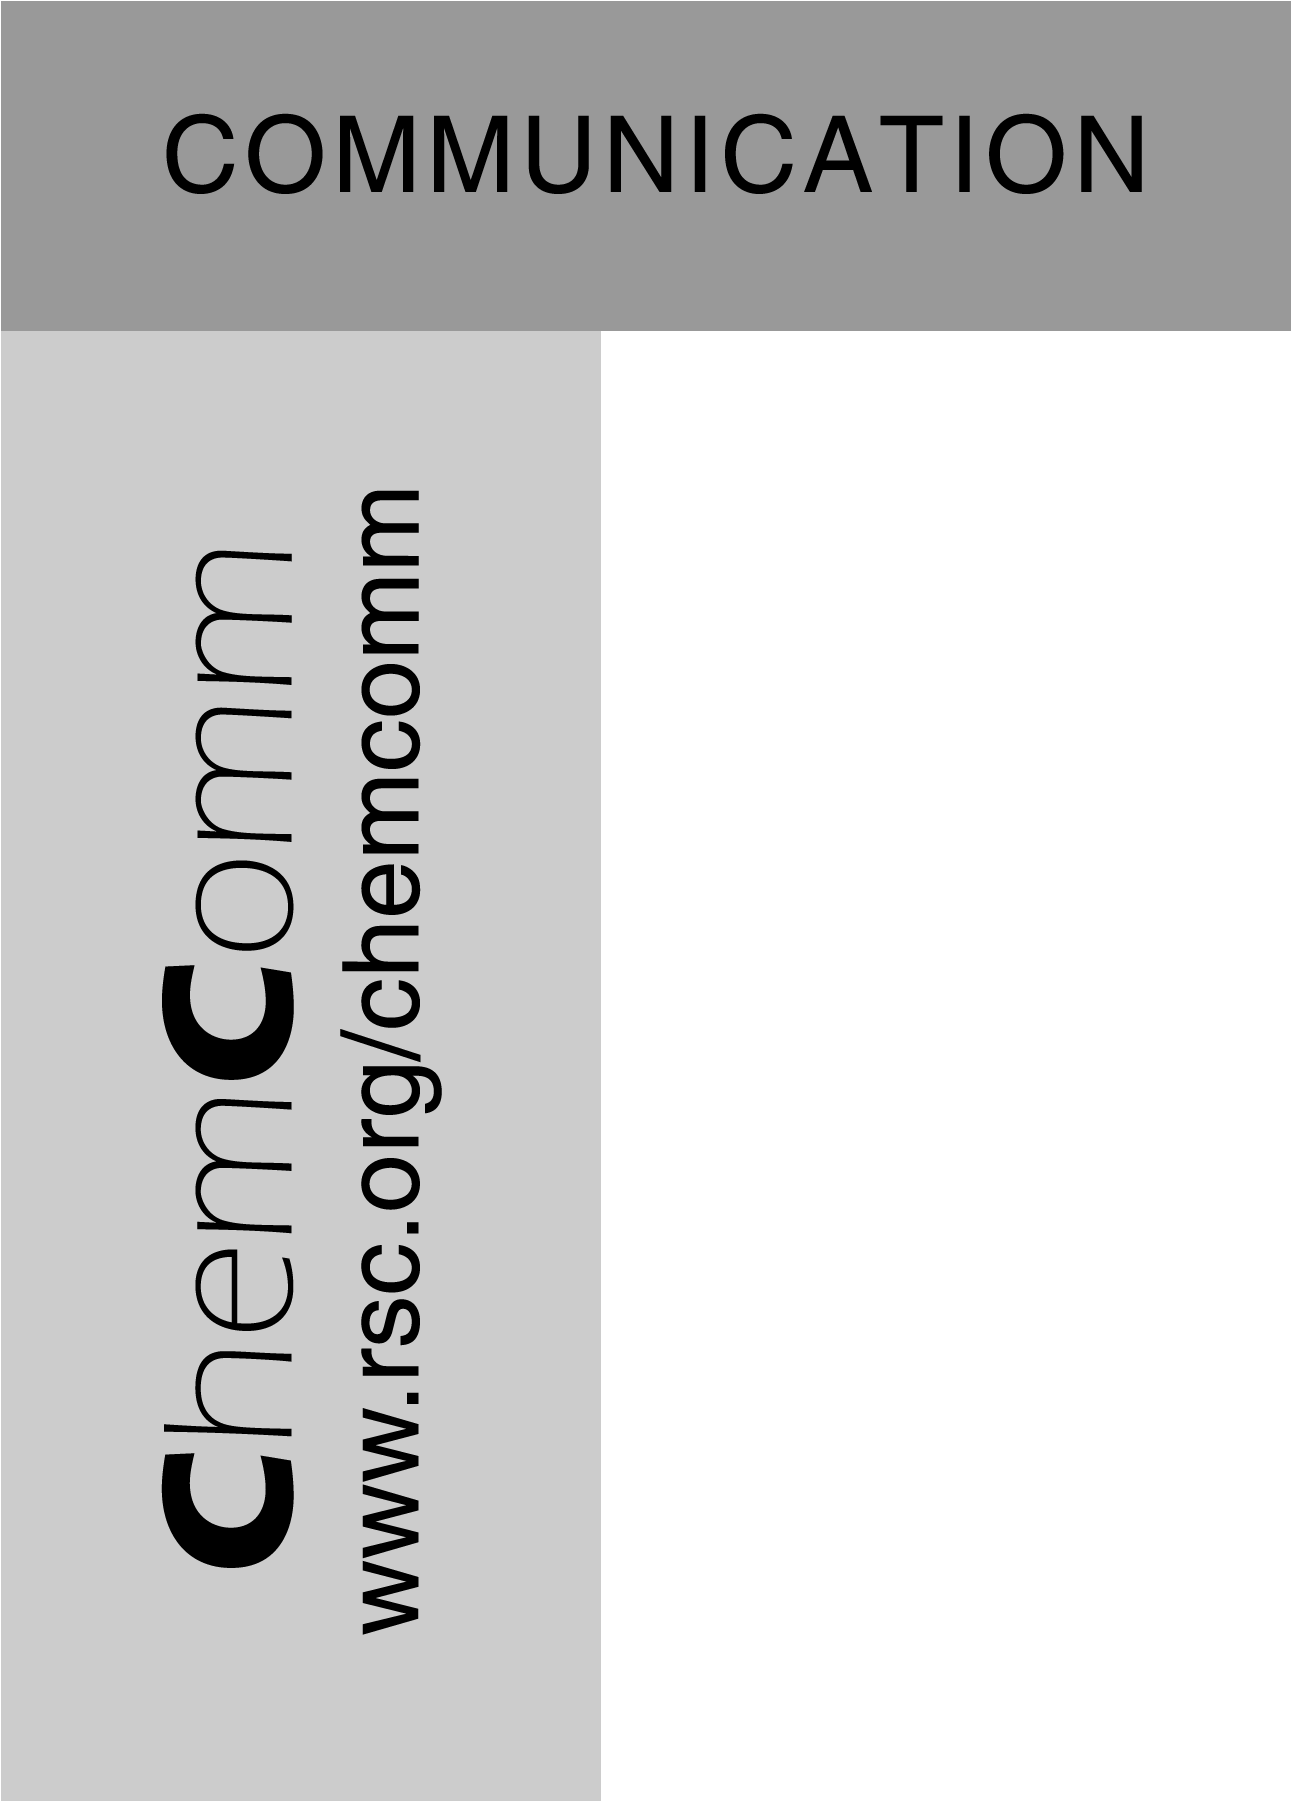
Novel Solvent Properties of Choline Chloride/ Urea Mixtures

Andrew P. Abbott*, Glen Capper, David L. Davies, Raymond K. Rasheed and Vasuki Tambyrajah

a Chemistry Department, University of Leicester, Leicester, UK, LE1 7RH. Fax: 116 252 3789; Tel: 116 252 2087; E-mail: Andrew.abbott@le.ac.uk

Spectroscopic Information on Choline Chloride (CC): 2Urea mixture

1H nmr (40 C):- **Me**3, 9H, s, 3.42; -C**H2**, 2H, m, 3.73; -C**H2**, 2H, m, 4.18; O**H**, 1H, v. broad, 5.50; N**H2**, 8H, broad, 6.24

13C {1H} nmr (50 C):- **Me**3 54.40; -**C**H2 56.26; -**C**H2 68.20; **C**(urea) 162.21

35Cl nmr (50 C):- +44.493, broad (wrt NaCl in water)

FAB-MS ran neat without matrix present

M+ - 104 [Choline]+

M- - 155 (Cl- + 2urea) very weak; 95 (Cl- + urea) weak

IR

C=O (Urea) 1681.3 and 1637.5 (Urea in Nujol mull) shifted to 1669.0 1618.4 cm-1 (2Urea: 1CC) respectively.

Physical properties

| Surface tension | 52.020.05 mN/m (25.00.2 C) |
| --- | --- |
| Density | 1.24gcm-3 (45 C) |
| Refractive index | 1.504 |

Spectroscopic Information on Choline Fluoride: 2Urea mixture

HOESY Spectrum of CF: 2Urea – Intense Correlation between F- and Urea protons

1H nmr (40 C):- **Me**3, 9H, s, 3.26; -C**H2**, 2H, m, 3.57; -C**H2**, 2H, m, 4.00; N**H2**, 8H, broad, 6.27; O**H**, 1H, v. broad, 6.83

19F nmr –110.2ppm
